# Supplementary material for: F-box protein FBXO31 is down-regulated in gastric cancer and negatively regulated by miR-17 and miR-20a
Source: PubMed Central journal article supplement (PMC4171621; doi:10.18632/oncotarget.2183), 2014-07-08
Supplement: oncotarget-05-6178-s001.pdf [file oncotarget-05-6178-s001.pdf]

**F-box protein FBXO31 is down-regulated in gastric cancer and negatively regulated by miR-17 and miR-20a**

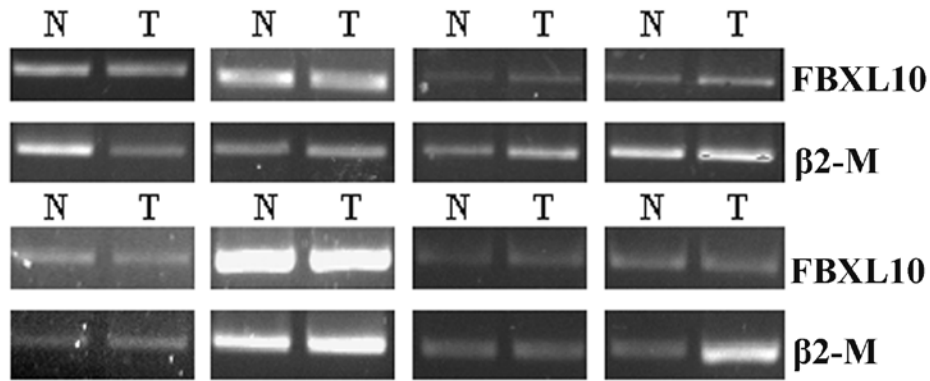

**Figure S1. RT-PCR analysis of FBXL10 mRNA level in GC specimens and adjacent non-tumor tissues. Representative results were shown.  $\beta$ 2-M was used as the control. N and T, normal and tumor tissue.**

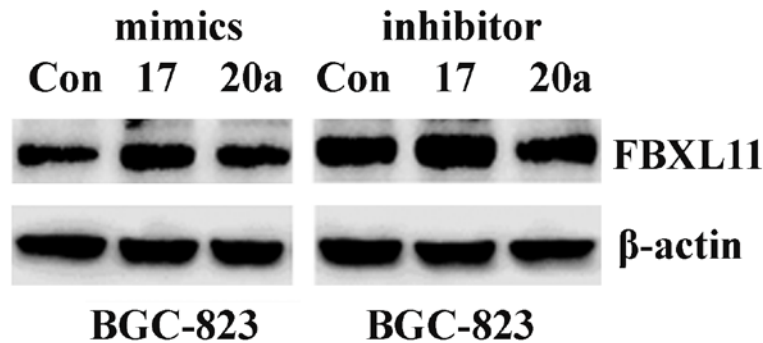

**Figure S2. The protein of FBXL11 was analyzed with western blot in gastric cancer cells transfected with miR-20a and miR-17 mimics or inhibitor.  $\beta$ -actin was used as the loading control.**

**Table S1: Sequences for construction of wild type (pMIR-FBXO31/wt) and mutants (pMIR-FBXO31/mut1 and pMIR-FBXO31/mut2 ) of the 3' UTR of FBXO31**

| Category                                        | Sequences                                                                                                                                                                                                                                                                 |
|-------------------------------------------------|---------------------------------------------------------------------------------------------------------------------------------------------------------------------------------------------------------------------------------------------------------------------------|
| Sequences for construction of pMIR-FBXO31/wt    | F:5'-GGACTAGTGGGGCTCTGAACTCTGACCT-3'<br>R:5'-CCCAAGCTTTCTGCTGTATTCAGGCTCGT-3'                                                                                                                                                                                             |
| Sequences for construction of pMIR- FBXO31/mut1 | F1:5'-<br>GGACTAGTGGGGCTCTGAACTCTGACCTGTGAATA<br>GAAGCAGCAT <u>CGTGATAGGAAATC</u> -3'<br>R1:5'-<br>GATTCCTATC <u>CACGATGCTGCTTCTATT</u> CACAGGTCA<br>GAGTTCAGAGCCCCACTAGTCC-3'<br><b>F2:5'-GCAGCAT<u>CGTGATAGGAAATC</u> -3'</b><br>R2:5'-CCCAAGCTTTCTGCTGTATTCAGGCTCGT-3' |
| Sequences for construction of pMIR- FBXO31/mut2 | F1:5'-CCCCC <u>CACGTGATAATGTAGA</u> -3'<br>R1:5'-CCCAAGCTTTCTGCTGTATTCAGGCTCGT-3'<br>F2:5'-GGACTAGTGGGGCTCTGAACTCTGACCT-3'<br>R2:5'-TCTACATT <u>TATCACGTGGGGGG</u> -3'                                                                                                    |

Table S2. Patient and tumor characteristics, FBXO31 protein expression in normal and gastric cancer specimens

| Patient and tumor characteristics |             |          |                   |                         | FBXO31 protein expression <sup>3</sup> |       |
|-----------------------------------|-------------|----------|-------------------|-------------------------|----------------------------------------|-------|
| No.                               | Age(yr)/Sex | Size(cm) | pTNM <sup>1</sup> | Histol/Dif <sup>2</sup> | Normal                                 | Tumor |
| 1                                 | 66/M        | 9.0      | T4N3M0            | MucinousA               | 0.66                                   | 0.31  |
| 2                                 | 64/F        | 3.5      | T4N2M0            | LDA                     | 1.35                                   | 0.36  |
| 3                                 | 68/M        | 7.0      | T4N3M1            | MDA                     | 1.58                                   | 0.38  |
| 4                                 | 51/M        | 3.0      | T3N2M0            | LDA                     | 1.12                                   | 1.09  |
| 5                                 | 72/M        | 2.5      | T4N3M0            | LDA                     | 1.32                                   | 0.89  |
| 6                                 | 63/M        | 5.5      | T4N3M0            | LDA                     | 1.96                                   | 0.79  |
| 7                                 | 70/F        | 4.0      | T4N1M1            | MDA                     | 1.67                                   | 0.10  |
| 8                                 | 62/M        | 5.0      | T4N1M0            | MDA                     | 1.19                                   | 0.01  |
| 9                                 | 62/M        | 6.0      | T4N2M0            | LDA                     | 0.43                                   | 0.03  |
| 10                                | 58/M        | 2.0      | T4N1M0            | MDA                     | 1.66                                   | 0.48  |
| 11                                | 74/M        | 6.0      | T3N0M0            | MDA                     | 1.98                                   | 1.18  |
| 12                                | 50/F        | 4.0      | T4N2M0            | LDA                     | 2.61                                   | 1.11  |
| 13                                | 56/F        | 7.5      | T4N1M0            | LDA                     | 0.20                                   | 0.56  |
| 14                                | 62/F        | 3.5      | T4N2M0            | LDA                     | 2.23                                   | 0.52  |
| 15                                | 38/F        | 8.0      | T4N1M0            | LDA                     | 1.09                                   | 1.33  |
| 16                                | 59/M        | 4.0      | T4N0M0            | MucinousA               | 0.96                                   | 0.87  |
| 17                                | 62/M        | 6.0      | T4N3M0            | LDA                     | 1.78                                   | 0.01  |
| 18                                | 58/F        | 4.0      | T4N3M1            | LDA                     | 1.08                                   | 1.09  |
| 19                                | 54/M        | 7.0      | T4N0M0            | MucinousA               | 0.75                                   | 0.23  |
| 20                                | 31/M        | 6.0      | T4N3M1            | LDA                     | 0.72                                   | 1.04  |
| 21                                | 54/M        | 4.0      | T2N0M0            | LDA                     | 2.12                                   | 0.41  |
| 22                                | 61/M        | 12       | T4N1M0            | LDA                     | 0.54                                   | 0.02  |
| 23                                | 49/M        | 3.0      | T4N0M0            | LDA                     | 0.82                                   | 0.14  |
| 24                                | 40/M        | 6.0      | T4N1M0            | MDA                     | 0.27                                   | 0.10  |
| 25                                | 61/M        | 5.0      | T4N0M0            | LDA                     | 0.38                                   | 0.15  |
| 26                                | 37/M        | 6.0      | T4N3M0            | LDA                     | 2.40                                   | 2.10  |

|    |      |     |        |           |      |      |
|----|------|-----|--------|-----------|------|------|
| 27 | 60/M | 5.0 | T4N3M0 | LDA       | 0.45 | 0.73 |
| 28 | 49/F | 3.0 | T4N1M0 | LDA       | 2.89 | 1.38 |
| 29 | 46/F | 2.0 | T4N2M1 | LDA       | 1.17 | 0.13 |
| 30 | 59/M | 6.0 | T4N3M0 | LDA       | 1.21 | 1.19 |
| 31 | 59/F | 11  | T4N3M0 | LDA       | 0.98 | 0.24 |
| 32 | 64/M | 5.5 | T4N3M0 | LDA       | 2.13 | 0.51 |
| 33 | 65/M | 5.5 | T4N3M0 | MucinousA | 1.06 | 0.22 |
| 34 | 68/M | 4.5 | T4N3M0 | LDA       | 1.67 | 0.21 |
| 35 | 68/M | 5   | T4N3M0 | LDA       | -    | -    |
| 36 | 52/F | 9.0 | T4N1M0 | MDA       | 0.42 | 0.21 |
| 37 | 69/M | 7.5 | T4N3M1 | LDA       | 1.35 | 0.47 |
| 38 | 46/F | 2.0 | T4N1M0 | LDA       | 2.78 | 1.12 |
| 39 | 59/M | 6.2 | T3N0M0 | LDA       | 2.69 | 1.02 |
| 40 | 68/M | 7.0 | T4N1M0 | MucinousA | 1.02 | 1.57 |
| 41 | 64/M | 5.5 | T4N1M0 | LDA       | 0.57 | 0.27 |
| 42 | 69/M | 8.0 | T4N2M0 | MDA       | 2.38 | 0.42 |
| 43 | 45/M | 10  | T4N2M0 | LDA       | 1.21 | 1.98 |
| 44 | 65/M | 10  | T4N3M1 | LDA       | 0.46 | 0.32 |
| 45 | 69/M | 7.5 | T4N3M1 | LDA       | 0.51 | 0.57 |
| 46 | 75/M | 9.5 | T4N0M0 | MDA       | -    | -    |
| 47 | 73/M | 6.0 | T4N2M0 | LDA       | 0.48 | 0.26 |
| 48 | 77/M | 1.5 | T4N2M0 | LDA       | -    | -    |
| 49 | 52/M | 1.5 | T4N3M0 | LDA       | -    | -    |
| 50 | 37/F | 13  | T4N3M1 | LDA       | 3.21 | 0.51 |
| 51 | 66/F | 3.5 | T4N2M0 | LDA       | 0.88 | 0.59 |
| 52 | 30/F | 4.5 | T4N3M0 | LDA       | 0.72 | 1.01 |
| 53 | 80/M | 11  | T4N3M1 | MDA       | 1.76 | 1.81 |
| 54 | 56/F | 5.4 | T4N2M0 | LDA       | 0.62 | 0.73 |
| 55 | 79/M | 5.5 | T4N2M0 | MDA       | 1.42 | 0.09 |
| 56 | 56/M | 5.5 | T4N1M0 | MDA       | 1.39 | 0.31 |

---

1. Pathologic tumor-node-metastasis.

2. Histology/Differentiation status: LDA, Low differentiated adenocarcinoma; MDA, Moderately differentiated adenocarcinoma; MucinousA, Mucinous adenocarcinoma.

3. FBXO31 expression levels in gastric cancer and matched non-cancerous specimens were analyzed using western blot. Relative abundances of protein were calculated based on the band density values and normalized with  $\beta$ -actin. -: undetectable.
